# **A multi-dimensional selective landscape drives adaptive divergence between and within closely related *Phlox* species**

Benjamin E. Goulet-Scott<sup>1, 2</sup>, Matthew C. Farnitano<sup>1,3</sup>, Andrea L. M. Brown<sup>1,4</sup>, Charles O. Hale<sup>1,5</sup>, Meghan Blumstein<sup>6</sup>, Robin Hopkins<sup>1, 7,\*</sup>

<sup>1</sup> Department of Organismic and Evolutionary Biology, Harvard University, Cambridge, MA 02138, USA

<sup>2</sup> Harvard Forest, Harvard University, Petersham, MA 01366, USA

<sup>3</sup> Current affiliation, Department of Genetics, University of Georgia, Athens, GA 30602, USA

<sup>4</sup> Current affiliation, Department of Environmental Science, Policy, and Management, University of California Berkeley, Berkeley, CA 94720, USA

<sup>5</sup> Current affiliation, Institute for Genomic Diversity, Cornell University, Ithaca, NY 14853, USA

<sup>6</sup> Civil and Environmental Engineering, Massachusetts Institute of Technology, Cambridge, MA 02139, USA

<sup>7</sup> Arnold Arboretum of Harvard University, Boston, MA 02131, USA

\*Corresponding author: Robin Hopkins, [rhopkins@fas.harvard.edu](mailto:rhopkins@fas.harvard.edu)

**Author Contributions:** BG-S and RH designed experiment; BG-S, MF, AB, CH and RH contributed to data collection; BG-S, MB and RH contributed to data analysis, BG-S and RH wrote the manuscript with all authors contributing to editing and revising.

**Competing Interest:** All authors have no competing interest.

**Classification:** Biological Sciences, Evolution

**Keywords:** Local adaptation; adaptive divergence, natural selection, common garden, *Phlox*

## Abstract

Natural selection shapes diversity across micro and macro-evolutionary scales. Selection causes local adaptation across populations within species and is simultaneously responsible for much of the divergence between species. However, it is unclear if either the force of or the response to selection is the same or different across these scales. Here we show that natural selection drives adaptive divergence between closely related species in a pattern that is distinct from local adaptation within a species. We use reciprocal common-garden transplant experiments across three species of *Phlox* wildflowers to show widespread adaptive divergence causing species to have highest fitness in their native habitats. Using provenance trials, we also find that one of these *Phlox* species has strong local adaptation between populations. We compare the axes of divergence and selection between these two scales of diversity and discover that one suite of traits predicts fitness differences between species and that an independent suite of traits predicts fitness variation within species across individuals. Our work reveals how forces of selection can both drive key divergence between species, allowing for and causing speciation, while simultaneously causing extensive diversity that is maintained across populations within a species. The selection landscape is complex and multidimensional

## Introduction

Ecological adaptation contributes to the origin and maintenance of biodiversity (1-4). Evolution by natural selection drives local adaptation among populations within a species that occupy different biotic and abiotic environmental conditions (5-8). Similarly, strong ecological selection can drive divergence between closely related species and cause reproductive isolation, leading to ecological speciation (1, 9, 10). Although extensive research has investigated local adaptation within species and investigated ecological divergence between species, little is known

about if and how these evolutionary processes are related. Are the axes of selection favoring adaptive divergence between species the same or different than the axes of selection favoring local adaptation within a species? Characterizing local adaptation both within and between closely related species can offer insight into how ecological adaptation generates diversity from the micro- to macroevolutionary scale.

Disparate populations within wide-ranging species often evolve to become adapted to the local ecological conditions (7). Across the tree of life there are striking examples of variation in morphology, physiology, and phenology within species across populations that span significant gradients of temperature, water availability, seasonality, and types of biotic interactions (11-16). Local adaptation among populations within a species is not inevitable, and depends on the relative strengths of selection and migration (17), the presence or absence of fitness trade-offs in different habitats (6), and the genetic correlation between traits (18-20). Nevertheless, meta-analyses of the local adaptation studies conclude that adaptive divergence between populations of a species is widespread in nature (6, 21).

As taxa become reproductively isolated, they tend to evolve suites of diverged traits that lead to higher fitness (survival or reproduction) in local or native habitats compared to habitats of closely related taxa. Adaptive divergence often leads to a similar pattern of reciprocal local vs. foreign advantage between closely related species as the pattern that we see between locally adapted populations within a single species. Even when closely related species are in broad sympatry with extensive geographic overlap, we may expect a pattern of adaptive divergence. Interspecific competition for resources can select for ecological divergence and niche partitioning driving either species-wide patterns of differentiation or leading to patterns of character displacement in sympatry (2, 22). Therefore, we expect many of the traits that

differentiate species from each other to be the suites of traits that lead to differential fitness and thus ecological reproductive isolation between the species. In this way, adaptive divergence not only causes phenotypic differentiation between taxa but also contributes to the cessation of gene flow between taxa, leading to speciation. For this reason, ecological adaptation is considered important during the speciation process. In fact, environmental divergence and ecological divergence are often added to, and portrayed as parallel to, the speciation continuum from no reproductive isolation to complete reproductive isolation (23, 24).

The idea of a continuum of adaptive ecological divergence -- from producing and maintaining diversity within species to causing reproductive isolation between species -- invites us to consider how patterns of adaptation within and between species may or may not be related (2, 25). Under one notion of this continuum, the adaptive divergence that we see between species is an extreme case of the local adaptation we see within species across populations and therefore could be due to similar axis of selection and involve similar types of trait divergence (Fig. 1, top & bottom right). Alternatively, the types of selection driving divergence between species could be distinct from the selection pressures favoring local adaptation within a species (Fig. 1, top & bottom left). Under this latter scenario, the trait divergence that differentiates species is different from the variation that we see within a species. Importantly, ecological divergence and speciation unfolds over evolutionary time, and the snapshot of divergences we see now between populations and species does not directly tell us about how the process of speciation did or will proceed in this system (24). Nonetheless, comparing patterns of phenotypic divergence and axes of selection across phylogenetic scales can help us understand how phenotypic diversity is generated and maintained under different scales of geographic range and genetic exchange.

*Phlox pilosa* subsp. *pilosa* (hereafter “*pilosa*”), *P. amoena* subsp. *amoena* (*amoena*), and *P. pilosa* subsp. *deamii* (*deamii*) are three closely related perennial wildflower taxa inhabiting the eastern U.S. that provide a promising system in which to evaluate patterns of ecological differentiation, both within and between species (26). The ranges of these three *Phlox* taxa overlap in western Kentucky, Tennessee, and Indiana, but they rarely co-occur in the same locality, suggesting differences in habitat preference (26-28). Here, we use a combination of reciprocal transplant and provenance trial approaches to evaluate the presence and strength of local adaptation between and within species. Since the foundational experiments of Turesson (29), and the team of Clausen, Keck, and Heisey (30), reciprocal transplants have been the standard for studying ecological differentiation within and between species. Provenance trials can also be used to study local adaptation, in which the performance of a diverse panel representing population variation throughout a species’ range is evaluated in a common ecological setting (31-33). Here we: 1.) model and compare the ecological niches of the *Phlox* species; 2.) determine whether there is adaptive divergence between the three species; 3.) infer if there is local adaptation within *Phlox* species; and 4.) evaluate patterns of phenotypic diversity across all three species and compare axes of selection driving divergence between and within species. Collectively, this study provides unique insights into how selection operates to drive diversity across scales of micro- and macro-evolution.

## Results

### *Ecological niche modeling*

We built robust ecological niche models for the two widespread *Phlox* species, *amoena* and *pilosa*, using available occurrence data and biologically relevant environmental variables

(Fig. 2A, Fig S1, TableS1 & S2). The predicted extents of suitable habitat conform well to the described geographic ranges of these species with a broad range of sympatry from Georgia to Kentucky (27, 28). We cannot build an ecological niche model for the third species, *deamii*, due to the low number of known occurrence points. It is hypothesized that *deamii* populations experience a narrow range of environmental conditions and are broadly sympatric with both *amoena* and *pilosa* (27).

From a principal component analysis (PCA) of the environmental variables used to build our niche models, we find that *pilosa* inhabits a greater breadth of ecological variation than does *amoena* (Fig. 2B). While both species occupy a similar amount of variation on PC2, *amoena* occupies a subset of the variation covered by *pilosa* on PC1. We find that the median conditions occupied by *amoena* and *pilosa* are significantly different on PC1 but not on PC2 (Fig S1C.). Of note, the common garden sites chosen to represent *amoena* and *pilosa* habitats in our reciprocal transplant experiment described below differ on PC1 as well (colored diamonds in Fig. 2B). The reciprocal transplant experiment includes individuals sampled from populations that reasonably encompass the environmental variation experienced by these species (black edged circles Fig. 2B, Table S5).

### *Adaptive divergence between taxa*

We find strong evidence of adaptive divergence between *Phlox* species from our reciprocal transplant experiments. Multiple individuals sampled from source populations throughout the ranges of these three perennial *Phlox* species (black diamonds and circles Fig. 2A) were clonally replicated into common gardens in the native sympatric range of these species. Our experiment included three garden sites each adjacent to a wild population of one of the focal

taxa (Fig. 2C, D & E, Table S6). We quantified five fitness-related traits: herbivory, fruit number, flower number, biomass, and survival and find that a significant taxon-by-garden interaction predicts trait values, indicating that the relative success of the species depends on the garden in which they are grown (Fig. 3; Table 1). Adaptive divergence is evidenced by either the local species having higher fitness than the foreign species in the local species' garden, or by a focal species having highest fitness in its home garden compared to all other away gardens.

All significant local vs. foreign comparisons match the prediction of adaptive divergence between taxa with the local taxon outperforming the foreign taxa (Table 1). In the amoena habitat, amoena had higher survival and experienced significantly less herbivory than both pilosa and deamii, and produced more fruits than pilosa plants. In the deamii habitat, deamii had significantly higher survival than pilosa. In the pilosa habitat, pilosa plants produced significantly more fruits, and survived at a higher rate than both amoena and deamii plants.

Home vs. away comparisons (comparing across habitats for each taxon) showed some significant differences in the direction predicted by local adaptation (Table 1). Pilosa had the highest fitness in the home garden compared to in the other gardens on all five fitness traits. Deamii had less herbivory and set more fruits in the home garden compared to the amoena garden. We also found some patterns of success that did not indicate highest success at home-sites. For instance, deamii and amoena had fewer flowers and fruits in their home gardens compared to either of the other gardens.

Due to limited availability, tests for local adaptation with deamii suffered from low power. We found some qualitative patterns consistent with local adaptation (Fig 3); notably, the proportion of plants that survived to the end of the experiment matches the prediction of adaptive differentiation for all local vs. foreign and home vs. away comparisons. If we consider post-hoc

comparisons just between amoena and pilosa (excluding deamii due to its lower sample size) a clearer pattern of adaptive differentiation between these species emerges, with significant local vs. foreign comparisons matching the prediction of local adaptation in herbivory, fruit number, and survival (Table 1).

# *Local adaptation within species*

We find strong evidence of local adaptation across populations within pilosa. We used statistical models to estimate the contribution of the source population to variation in the five fitness-related traits for amoena and pilosa. We could not include deamii in this analysis because there was insufficient variation across the three populations. Local adaptation was evidenced by a negative relationship between the estimated population effect on fitness and distance of the population from the common garden. This relationship was tested for geographic distance, genetic distance (as measured by  $F_{ST}$  using data from Goulet-Scott et al. 2021 (26)), and environmental distance (as measured in climate PC space) between populations (Table S3 & S4).

For the pilosa species within the pilosa garden, the population effect on flower and fruit fitness traits is strongly negatively correlated with geographic distance, environmental distance, and genetic distance, as predicted by local adaptation. Final biomass in pilosa also shows a strong negative correlation with geographic distance (Fig. 4; Table S4). In other words, individuals from populations further away from the common garden did worse than individuals from populations closer to the garden. In the amoena habitat, pilosa populations also show strong negative correlations between biomass and geographic distance, and between flower number and all three distances (Table S4). In the amoena garden, pilosa populations show a strong positive correlation between the proportion of plants without herbivore damage and both genetic and

geographic distance; this represents the only signal in our data that does not support local adaptation. Within the deamii garden, pilosa populations show a negative correlation between the number of flowers produced and geographic distance while amoena populations show negative correlations between survival and both genetic and environmental distance. There was insufficient variation in herbivory among amoena populations and survival among pilosa populations to model population effects suggesting no evidence for local adaptation in these two traits.

### *Selection between and within species*

Adaptive differentiation between *Phlox* species and local adaptation within species occur along different axes of variation in leaf morphology and physiology, likely driven by different axes of selection. For each individual genotype used in the experiment, we measured or calculated six phenotypic traits including: leaf length, leaf width, leaf length/width ratio, leaf area, leaf chlorophyll content, and specific leaf area (SLA), and summarized phenotypic variation in a principal components analysis (Fig. 5). For the subset of fitness traits that showed evidence of adaptive divergence between species and local adaptation within pilosa species we asked if phenotypic PC1 or PC2 predicted fitness variation between and within species in the Pilosa-habitat common garden (Table 2).

The principal components analysis summarizing the phenotypic variation across species sharply divides pilosa from amoena and deamii individuals along PC1 (Fig. 5a.). In fact, taxon identity explains 72% of the variation along this first principal component ( $F(2, 318)=417.34$ ,  $p<0.001$ ). PC1 explains 45% of trait variation and describes leaf shape. Long narrow leaves and low chlorophyll content are at one end of the PC axis (pilosa-like), and short wide leaves with

high chlorophyll content are at the other (amoena-like). All species show extensive and overlapping variation along PC2, which explains 27.8% of the phenotypic variation and corresponds to variation in size of the leaf (area and SLA). Taxon identity explains none of the variation along PC2 ( $F(2,318)=0.8$ ,  $p=0.451$ ).

We investigated how leaf trait variation (PC1 and PC2) explained variation in fitness traits (fruit set, flower set, and biomass) in the pilosa garden both between and within species using two sets of models. First, we modeled variation in fitness traits as explained by each trait PC while controlling for taxon and the interaction between taxon and trait PC. For PC1, we found that taxon identity predicted fitness related traits consistent with our tests of adaptive divergence previously discussed. Due to the collinearity between taxon identity and value at PC1, this trait PC is not significant in our model when controlling for taxon (Table S7). Pilosa individuals have both higher values long PC1 and high fitness in the pilosa garden. For PC2 the interaction term in our model is significant indicating that the relationship between PC2 and fitness traits varied across species (Table S7). With our second set of models, we evaluated how each leaf trait PC predicts fitness traits across all the species and within each of the species (Table S8). PC1 does not predict fitness variation within any of the three species; it is only when individuals from all three species are included in the model that we see a significant relationship between PC1 and fitness-related traits (Fig. 5b.,d.,f., Table S8). In contrast, we find that within pilosa and amoena PC2 strongly predicts fitness trait and that this variation explains the significant relationship between PC2 and fitness in the combined dataset. (Fig. 5c.,e.,g., Table S8) Together our models indicate that leaf shape (PC1) differs significantly between *Phlox* species and it is therefore these differences that correspond to fitness differences *between* species

in the common garden. In contrast, leaf size (PC2) varies within species and significantly predicts *within* species variation in fitness in the common garden (Table S8).

# **Discussion**

Natural selection is widely acknowledged as the most important force driving the evolution of biological diversity, yet we still have much to learn about how this process acts across micro- and macro-evolutionary scales. At one end of this scale, populations within a species can locally adapt in response to variation in selection across space, generating diversity within a species; while at the other end, response to selection can drive adaptive divergence between taxa and even cause significant reproductive isolation, thus contributing to speciation. Many studies have characterized the response to selection at a given scale, yet there are few studies that integrate across scales to compare how selection drives divergence within and between species.

Here we have characterized adaptive divergence between closely related species and local adaptation within one of these species. Furthermore, we show that selection driving divergence between species is distinct from, and orthogonal to, selection driving divergence within species. Our results suggest a broadly applicable explanation of how a species can both maintain extensive adaptive phenotypic variation across broad ecological habitats while simultaneously maintaining distinct adaptive divergence from recently diverged taxa. Selection acts along many axes and the axis correlated with reproductive isolation and species interaction may be entirely different from the axis allowing populations to locally adapt across a species' range.

Our results suggest that natural selection drove adaptive divergence between the three co-occurring species of *Phlox* – *pilosa*, *amoena*, and *deamii*. The wide-spread species – *pilosa* and

amoena – show broadly sympatric ranges with statistically significant yet minimal niche divergence. Specifically, after reducing dimensionality of multiple environmental and soil variables, we find that amoena inhabits a distinct subset of the broader environmental tolerance of pilosa. This likely reflects the more northern range limit of pilosa compared to amoena. Nevertheless, all three species show significant overlap in both geographic and environmental space. While our niche modeling suggests minimal adaptive divergence between species, our experimental gardens reveal extensive fitness differences.

Across the five proxies for fitness we measured, we found that the local species generally does better in its local habitat garden as would be predicted by adaptive divergence between species. Because we measured five traits in three gardens across three species, we performed abundant statistical tests to identify patterns of differential success, which likely have led to some false positives. We focus not on the results from any specific test but instead on the robust pattern that, for each species, we found evidence for natural selection favoring the local species. The specific patterns of adaptive divergence are different for each species, which is consistent with other studies that find that different lineages locally adapt in different ways (15). For example, in the amoena garden we found amoena had the highest survival across the three year experiment. In this garden there was extensive large-mammal herbivory with nearly 50% of the plants showing signs of severe damage, but amoena plants suffered the least damage. The pilosa garden had the greatest sun exposure and the pilosa plants seem to exploit this light to have the highest survival and set the most fruits. Yet, pilosa individuals also suffered the most when grown in the other gardens, potentially in response to low-light availability. Although our conclusions of adaptive differentiation are strongly supported, this work inspires future investigations to untangle the specific selective agents and traits underlying this pattern.

The support for adaptive differentiation between species may be particularly surprising given that the three common gardens were geographically close (within 120 km of each other) but the individuals in the garden were sourced from across the country, spanning 900 km. The patterns of adaptation were robust to the extensive geographic sampling and the breadth of source environmental conditions. This suggests that the traits that adaptively differentiate the species are shared across populations within their ranges and could therefore contribute to ecological reproductive isolation between species.

As is often observed for widespread species, one of our *Phlox* species also shows strong patterns of local adaptation among populations. Two of our *Phlox* species span extensive environmental gradients with large (and overlapping) geographic ranges. This presents the opportunity for selection to favor different trait values between, for example the warm and dry habitats in northern Florida and the cooler and wetter populations in western Kentucky. If local adaptation within species is driven by these ecological gradients across their ranges, then we predict that as distance increases between population source and an experimental garden, fitness will decrease. This is precisely the pattern we documented across *pilosa* populations. Individuals sourced from populations near the *pilosa* experimental garden grew bigger, had more flowers, and set more fruits than individuals from populations farther way from the experimental garden. This signal was robust to various measures of distance including geographic distance, environmental distance, and genetic distance. Interestingly, this negative relationship between fitness measures and distance from garden is also strong for *pilosa* individuals grown in the *amoena*-habitat garden. As noted above, all *pilosa* individuals do worse in the *amoena* garden than in the *pilosa* garden, but *pilosa* individuals sourced from farther away do even worse in the *amoena* garden than individuals sourced from nearby. We interpret this pattern to mean that there

are traits that make pilosa individuals more fit in the northern part of the range, where the common gardens were located, as compared to the southern part and that this difference in success is independent of precise location (i.e., adjacent to a wild pilosa population or a wild amoena population).

Interestingly, we found little to no signal of local adaptation in amoena populations. We hypothesize that this difference in degree of adaptation within pilosa and amoena species could reflect either differences in migration or selection. High migration between populations of amoena could cause homogenization of genetic variation across the range and swamping of locally adapted alleles. This is unlikely to explain the difference in pattern between species since the range of genetic distances ( $F_{ST}$ ) represented in our experiment were similar for amoena (0 – 0.44) and pilosa (0 – 0.46) and for a given distance between populations,  $F_{ST}$  is actually higher for amoena than pilosa (Goulet-Scott et al. 2021; Fig. 4B (26)). In contrast, the range of environmental distances (based on a PCA of environmental variables) represented in our experiment was significantly less for amoena (0 – 3.48) than for pilosa (0 – 5.53). Therefore, pilosa populations may face stronger selection throughout their range to adapt to local ecological conditions.

By characterizing adaptive divergence between species and local adaptation within a species, we can compare and contrast how natural selection generates diversity across these scales. We quantify diversity in leaf morphological and physiological traits across species and find that orthogonal axes of diversity predict fitness between species versus within species. These three species of *Phlox* grow in close geographic proximity, share pollinators, and have similar flower shape, size, color and timing. Therefore, their major phenotypic axis of diversity is in vegetative traits such as leaf morphology. Pilosa plants have long narrow leaves whereas

amoena plants have shorter, wider leaves. Both species show extensive variation in the overall size and mass of the leaf.

Our results demonstrate that the major leaf-trait differences between species strongly predict fitness variation across species in our common-garden experiments. Plants with wider, shorter leaves do better in the amoena garden and plants with longer narrower leaves do better in the pilosa garden. It is perhaps unsurprising, that the traits that phenotypically differentiate species also predict fitness differences across the species' habitats. We have highlighted the link between key traits that define and differentiate closely related species, and fitness differences between species in their respective habitats.

This axis of phenotypic variation differentiating species (PC1) does not predict fitness variation within a species; instead, orthogonal trait variation (PC2) predicts within-species relative success. We found evidence of local adaptation across multiple proxies of fitness in pilosa. For all of these proxies we find that success of an individual is strongly predicted by size of the leaf (PC2) but not the shape of the leaf (PC1). We also find that leaf-trait PC2 value predicts fitness in amoena plants, further supporting the notion that different traits predict success within and between species.

The observation that adaptation within and between species operates along different axes of selection, might seem surprising given the perspective of a continuum of divergence between locally adapted populations and ecologically isolated species. The ecological speciation hypothesis suggests that populations within a species diverge ecologically until those populations evolve sufficient reproductive isolation and become distinct species. What we have demonstrated is that the process is multi-dimensional: if ecological divergence along one axis leads to reproductive isolation and a signature of local adaptation between lineages, then local adaptation

between populations within each lineage may persist or develop along other ecological axes. As has been articulated by others (24), the process of speciation is complex and not linear; similarly, the role of selection in driving divergence is also complex and multi-dimensional.

Further research is needed to determine if different ecological factors are more or less likely to drive between or within species divergence. For example, adaptive divergence driven by ecological factors with discrete or step-like variation may be more likely to contribute to reproductive isolation between species due to the absence of intermediate habitat that could be suitable for hybrids (9, 34). In contrast, local adaptation to ecological factors that vary more continuously may be less likely to lead to reproductive isolation and therefore act among populations within species. Selective landscapes are clearly multifaceted; our study showcases this by demonstrating that different ecological forces generate divergence between closely related species than among populations within a species.

## Methods

### *Ecological niche modeling*

We used ecological niche modeling to assess environments occupied by our *Phlox* species. We combined coordinates from our field collections and occurrence data from the Global Biodiversity Information Facility (GBIF; <https://www.gbif.org/>) and the Southeast Regional Network of Expertise and Collections (SERNEC; <https://sernecportal.org/portal/>), including records within the native ranges that were identified to subspecies (*Phlox amoena* subsp. *amoena*, *Phlox pilosa* subsp. *deamii*, and *Phlox pilosa* subsp. *pilosa*). We thinned occurrences to one within 20km using the R package ‘spThin’ (35) and retained 33 *amoena*, 87

pilosa, and only 5 deamii (Table S2). We could not perform ecological niche modeling analyses for deamii due to low occurrences.

We extracted bioclimatic variables from the WorldClim dataset (<https://www.worldclim.org/data/bioclim.html>) and soil composition and chemistry variables from the Unified North America Soil Map ([https://daac.ornl.gov/NACP/guides/NACP\\_MsTMIP\\_Unified\\_NA\\_Soil\\_Map.html](https://daac.ornl.gov/NACP/guides/NACP_MsTMIP_Unified_NA_Soil_Map.html)) at each occurrence location for amoena and pilosa. We reduced collinearity between variables to retain 11 variables with correlation coefficients  $<0.8$  (Table S1). With these variables, we constructed Maxent ecological niche models for amoena and pilosa using the R package ‘dismo’ (36) following established protocols (37, 38). Model performance was evaluated using a repeated cross-fold approach in which 90% of the data were sampled to train a Maxent ENM before testing the model with the remaining 10% of the occurrence points. For both amoena (median testing AUC = 0.942) and pilosa (median testing AUC = 0.889), we were able to construct robust niche models (Figure S1).

We performed a principal components analysis on all environmental and soil variables used in our niche models. We assessed if the niches of the two species differed by comparing the empirical differences between species in median and breadth (difference between 5<sup>th</sup> and 95<sup>th</sup> percentile) along PC1 and PC2 to a null distribution defined by bootstrap resampling 1000 times the pooled and randomly reassigned occurrence points across both species (37, 39, 40) (Fig S1). This PCA was later used to calculate environmental distances between populations.

*Plant propagation*

We propagated collections of 122 genotypes of *Phlox amoena amoena* (eight populations), 125 genotypes of *Phlox pilosa pilosa* (nine populations), and 37 genotypes of *Phlox pilosa deamii* (three populations) from throughout their native ranges for our common garden experiment (Table S5). Wild plants were collected as cuttings of vegetative shoots and rooted and grown in the greenhouse facilities at the Arnold Arboretum of Harvard University. After growing for nine months replicate cuttings, each four inches in length, were taken from vegetative shoots on each plant and rooted and grown in fine potting media for one month before being transplanted into experimental gardens. To increase the sample size for *deamii*, we included two individuals per genotype in each garden, while only one individual per genotype was planted in each garden for the other two taxa.

#### *Experimental gardens and fitness measurements*

We established three experimental gardens adjacent to one native population of each taxon (Table S6). Each garden site contained four cleared plots into which the 321 plants were assigned a randomized position. Clonal cuttings from the greenhouse were planted in their assigned position, which was marked by an aluminum tag. Each plot was protected from large herbivores by PVC and chicken wire cages for one year after planting. The gardens were watered immediately after planting and then weekly for a month at which point supplemental watering stopped.

We monitored fitness-related traits in the gardens over the course of three growing seasons between planting in April 2018 and final data collection in September 2020. Survivorship across all three gardens in the first year was high (92.5% in *amoena* garden, 91.9% in *deamii* garden, 92.8% in *pilosa* garden, 92.4% total). At the end of the first winter in early

2019, we removed the wire cages and returned regularly to record traits throughout spring and summer. We recorded damage from large vertebrate herbivores as a binary trait (0 = herbivore damage, 1 = no herbivore damage). We counted the total number of open flowers on each plant on a weekly basis from beginning of April through beginning of June 2019. Flowers on these taxa remain open and fresh for about one week, so our timing minimized double counting or missing flowers. We counted the total number of fruits set by each plant including both mature fruits that remained on the plant as well as open calyces where fruits had already shattered. In October 2019, we harvested all aboveground biomass for each plant, leaving root systems and the stem at the base of each plant intact consistent with the annual aboveground die-back that these taxa experience each winter. We dried this tissue in a drying oven at 60° C for 48 hours before measuring the mass with an electronic scale. We were not able to return to the gardens again until September 2020 when we recorded final survival.

### *Between species adaptive divergence analyses*

To test the hypothesis of adaptive differentiation between taxa, we used a generalized linear mixed model (GLMM) approach implemented in the R package ‘lme4’ (41, 42). For each fitness-related trait measured in the gardens, we modeled trait value with fixed effects of taxon, garden, and taxon-by-garden interaction and a random effect of genotype nested within population. Each genotype occurred at least once as a clonal replicate in each garden. For herbivory and survival we used a binomial link function in our models, while for number of flowers and fruits we used a Poisson link function. For biomass, we transformed the raw data by taking the natural logarithm and modelled this trait using a linear mixed model. After fitting each model, we evaluated them using ANOVA as implemented in the R package ‘car’ (43).

Local adaptation between the species is expected to result in a significant taxon-by-garden interaction effect. Specifically, we predict the local taxon to outperform the two foreign taxa in its home garden (local vs. foreign comparisons) and/or for each taxon to perform better in its home garden than in other two habitats (home vs. away comparison) (7). To test these predictions we performed post-hoc contrasts using Tukey's Test as implemented in the R package 'multcomp' (44).

# *Within species local adaptation analyses*

We implemented a provenance trial analysis to test for local adaptation and thus expected a negative correlation between a plant's performance and the distance between its source and the experimental garden in which it was measured. We calculated distance between experimental garden and source population in three ways: geographic, genetic, and environmental (Table S3). We calculated geographic distance with longitude/latitude of each population's wild collection site and each experimental garden using the Haversine formula as implemented in the R package 'geosphere' (38). We calculated the genetic distance as  $F_{ST}$  between each wild source population and an intraspecific population adjacent to each experimental garden site. DNA sequencing and  $F_{ST}$  calculations among these populations are detailed and reported in Goulet-Scott et al. 2021. Briefly, five individuals from each wild population were sequenced using double digest restriction-site associated DNA sequencing (ddRADseq), and all pairwise Weir-Cockerham  $F_{ST}$  values between populations were calculated using VCFtools (45, 46). Finally, we calculated environmental distance as the Euclidean distance between each population's wild collection site and each experimental garden site in PC1 vs. PC2 space of the environmental PCA that accompanied ecological niche modeling detailed above.

To quantify the contribution of the source population to the fitness of each clone in the experimental gardens, we used a GLMM. For each species, we modeled fitness trait value with a random effect of population nested within garden, using the same link functions for each trait as described previously. These models yielded “population random effects” for each garden that estimated the average effect on the fitness trait value in that garden attributable to being from a given population. To test for local adaptation, we regressed population random effects for each trait/taxon combination against each measure of distance using linear models as implemented in base R (47). For each linear model, we recorded the coefficient associated with the distance predictor, the coefficient of determination ( $R^2$ ), and associated  $p$ -value.

### *Between and within species trait selection analyses*

Finally, we evaluated how morphological and physiological trait variation predicted fitness both between and within species. We measured a standard suite of morphological and physiological traits on a clonal replicate of each experimental individual growing in the Arnold Arboretum greenhouse. These trait measurements required destructive sampling and were therefore not able to be measured on the plants growing in the field without compromising the experiment. From each plant, the most recently fully expanded leaf was collected and the following measurements taken: fresh mass, relative chlorophyll content using an atLeaf chlorophyll meter (FT Green, Wilmington, DE, USA), and dry mass. Each fresh leaf was scanned and we used ImageJ to measure leaf length, width, and area. We calculated specific leaf area (SLA) as area ( $\text{cm}^2$ ) divided by dry mass (g). We summarized variation in leaf traits by performing principal component analysis (PCA) on leaf length, width, length/width ratio, area, relative chlorophyll content, and SLA using the correlation matrix. Together the first two

principal components described over 70% of the phenotypic variation and were thus used in subsequent analyses (PC1 = 45.0% of variation explained, PC2 = 27.8%). We used a linear model in R to determine the extent to which species identity explains variation on PC1 and PC2.

Because we were interested in understanding fitness variation both within and between species we focused our analyses on plants in the pilosa garden and the three fitness traits that showed both adaptive divergence between species and local adaptation within pilosa (flower number, fruit number, and biomass). For these analyses, fitness traits and PC axes were normalized with a mean of 0 and standard deviation of 1. First, we implemented two linear models in R, one for each of the first two PCs, to ask how PC of trait variation, taxon identity, and the interaction between these two main effects predicted fitness trait variation across all three species. Second, we implemented a series of simple linear models in R to specifically ask how PC1 and PC2 predicted fitness variation in four data sets: all species combined, only pilosa, only amoena, and only deamii. By comparing the results of these models for each fitness-trait we could assess whether the same dimension(s) of leaf trait variation predicted fitness within a species versus across all species together.

502     **Funding**

503     This study was funding by the National Science Foundation (DEB-1844906 to R.H.), and a  
504     Rosemary Grant Advanced Award from the Society for the Study of Evolution to B.G-S.  
505

# References

1. D. J. Funk, P. Nosil, W. J. Etges, Ecological divergence exhibits consistently positive associations with reproductive isolation across disparate taxa. *Proceedings of the National Academy of Sciences* **103**, 3209-3213 (2006).
2. V. Grant, *Plant speciation* (Columbia University Press, New York, New York, ed. 2nd, 1981).
3. E. Mayr, Ecological factors in speciation. *Evolution*, 263-288 (1947).
4. G. L. Stebbins, "Variation and evolution in plants" in Variation and evolution in plants. (Columbia University Press, 1950).
5. A. L. Hargreaves, R. M. Germain, M. Bontrager, J. Persi, A. L. Angert, Local Adaptation to Biotic Interactions: A Meta-analysis across Latitudes. *The American Naturalist* **195**, 395-411 (2020).
6. J. Hereford, A Quantitative Survey of Local Adaptation and Fitness Trade-Offs. *Am. Nat.* **173**, 579-588 (2009).
7. T. J. Kawecki, D. Ebert, Conceptual issues in local adaptation. *Ecol. Lett.* **7**, 1225-1241 (2004).
8. C. J. Lortie, J. L. Hierro, A synthesis of local adaptation to climate through reciprocal common gardens. *J. Ecol.* **110**, 1015-1021 (2022).
9. H. D. Rundle, P. Nosil, Ecological speciation. *Ecol. Lett.* **8**, 336-352 (2005).
10. D. Schluter, Evidence for ecological speciation and its alternative. *Science* **323**, 737-741 (2009).
11. J. Ågren, D. W. Schemske, Reciprocal transplants demonstrate strong adaptive differentiation of the model organism *Arabidopsis thaliana* in its native range. *New Phytol.* **194**, 1112-1122 (2012).
12. F. J. Alberto *et al.*, Potential for evolutionary responses to climate change - evidence from tree populations. *Glob Chang Biol* **19**, 1645-1661 (2013).
13. S. C. Campbell-Staton *et al.*, Winter storms drive rapid phenotypic, regulatory, and genomic shifts in the green anole lizard. *Science* **357**, 495-498 (2017).
14. H. E. Hoekstra, J. G. Krenz, M. W. Nachman, Local adaptation in the rock pocket mouse (*Chaetodipus intermedius*): natural selection and phylogenetic history of populations. *Heredity* **94**, 217-228 (2005).
15. D. B. Lowry, R. C. Rockwood, J. H. Willis, Ecological reproductive isolation of coast and inland races of *Mimulus guttatus*. *Evolution* **62**, 2196-2214 (2008).
16. M. Blumstein *et al.*, A New Perspective on Ecological Prediction Reveals Limits to Climate Adaptation in a Temperate Tree Species. *Curr. Biol.* **30**, 1447-1453.e1444 (2020).
17. T. Lenormand, Gene flow and the limits to natural selection. *Trends Ecol. Evol.* **17**, 183-189 (2002).
18. J. Antonovics, The Nature of Limits to Natural Selection. *Annals of the Missouri Botanical Garden* **63**, 224-247 (1976).
19. F. Eroukhmanoff, Just How Much is the G-matrix Actually Constraining Adaptation? *Evolutionary Biology* **36**, 323-326 (2009).

- 548 20. D. Schluter, Adaptive radiation along genetic lines of least resistance. *Evolution* **50**,  
549 1766-1774 (1996).
- 550 21. R. Leimu, M. Fischer, A Meta-Analysis of Local Adaptation in Plants. *Plos One* **3**, 8 (2008).
- 551 22. W. L. Brown, E. O. Wilson, Character Displacement. *Systematic Zoology* **5**, 49-64 (1956).
- 552 23. P. Nosil, L. J. Harmon, O. Seehausen, Ecological explanations for (incomplete) speciation.  
553 *Trends Ecol. Evol.* **24**, 145-156 (2009).
- 554 24. S. Stankowski, M. Ravinet, Defining the speciation continuum. *Evolution* **75**, 1256-1273  
555 (2021).
- 556 25. E. Mayr, *Systematics and the origin of species* (Columbia University Press, New York,  
557 New York, 1942).
- 558 26. B. E. Goulet-Scott, A. G. Garner, R. Hopkins, Genomic analyses overturn two long-  
559 standing homoploid hybrid speciation hypotheses. *Evolution* **75**, 1699-1710 (2021).
- 560 27. D. A. Levin, D. M. Smith, Hybridization and evolution in *Phlox pilosa* complex. *Am. Nat.*  
561 **100**, 289-& (1966).
- 562 28. J. H. Locklear, *Phlox: a natural history and gardener's guide* (Timber Press, 2011).
- 563 29. G. Turesson, The species and the variety as ecological units. *Hereditas* **3**, 100-113 (1922).
- 564 30. J. Clausen, D. D. Keck, W. M. Hiesey, Experimental studies on the nature of species. I.  
565 Effect of varied environments on western North American plants. *Experimental studies*  
566 *on the nature of species. I. Effect of varied environments on western North American*  
567 *plants.* (1940).
- 568 31. J. T. Anderson, N. Perera, B. Chowdhury, T. Mitchell-Olds, Microgeographic Patterns of  
569 Genetic Divergence and Adaptation across Environmental Gradients in *Boechera stricta*  
570 (Brassicaceae). *The American Naturalist* **186**, S60-S73 (2015).
- 571 32. M. Blumstein, R. Hopkins, Adaptive variation and plasticity in non-structural  
572 carbohydrate storage in a temperate tree species. *Plant, Cell & Environment* **44**, 2494-  
573 2505 (2021).
- 574 33. A. M. Wilczek, M. D. Cooper, T. M. Korves, J. Schmitt, Lagging adaptation to warming  
575 climate in *Arabidopsis thaliana*. *Proceedings of the National Academy of Sciences* **111**,  
576 7906-7913 (2014).
- 577 34. H. Wang, E. D. McArthur, S. C. Sanderson, J. H. Graham, D. C. Freeman, Narrow hybrid  
578 zone between two subspecies of big sagebrush (*Artemisia tridentata*: Asteraceae) .4.  
579 Reciprocal transplant experiments. *Evolution* **51**, 95-102 (1997).
- 580 35. M. E. Aiello-Lammens, R. A. Boria, A. Radosavljevic, B. Vilela, R. P. Anderson, spThin: an  
581 R package for spatial thinning of species occurrence records for use in ecological niche  
582 models. *Ecography* **38**, 541-545 (2015).
- 583 36. R. J. Hijmans, S. Phillips, J. Leathwick, J. Elith (2017) dismo: Species distribution  
584 modeling. p R Packag.
- 585 37. J. J. Grossman, Evidence of Constrained Divergence and Conservatism in Climatic Niches  
586 of the Temperate Maples (*Acer* L.). *Forests* **12**, 535 (2021).
- 587 38. R. J. Hijmans, E. Williams, C. Vennes, R. J. Hijmans (2017) geosphere:Spherical  
588 Trigonometry. p R Packag.
- 589 39. O. Broennimann *et al.*, Measuring ecological niche overlap from occurrence and spatial  
590 environmental data. *Global Ecology and Biogeography* **21**, 481-497 (2012).

40. Y. F. Molina-Henao, R. Hopkins, Autopolyploid lineage shows climatic niche expansion but not divergence in *Arabidopsis arenosa*. *Am. J. Bot.* **106**, 61-70 (2019).
41. D. Bates (2007) lme4: Linear Mixed-Effects Models Using Eigen and S4. R Packag.
42. D. Bates, M. Maechler, B. Bolker, S. Walker, Fitting Linear Mixed-Effects Models Using lme4. *Journal of Statistical Software* **67**, 1-48 (2015).
43. J. Fox *et al.* (2012) car: Companion to Applied Regression. R Packag.
44. T. Hothorn, F. Bretz, P. Westfall (2015) multcomp: Simultaneous Inference in General Parametric Models. R Packag.
45. B. S. Weir, C. C. Cockerham, Estimating F-Statistics for the Analysis of Population-Structure. *Evolution* **38**, 1358-1370 (1984).
46. P. Danecek *et al.*, The variant call format and VCFtools. *Bioinformatics* **27**, 2156-2158 (2011).
47. R. C. Team, R: A Language and Environment for Statistical Computing R. Foundation for Statistical Computing Version 4.0. 2. (2020).

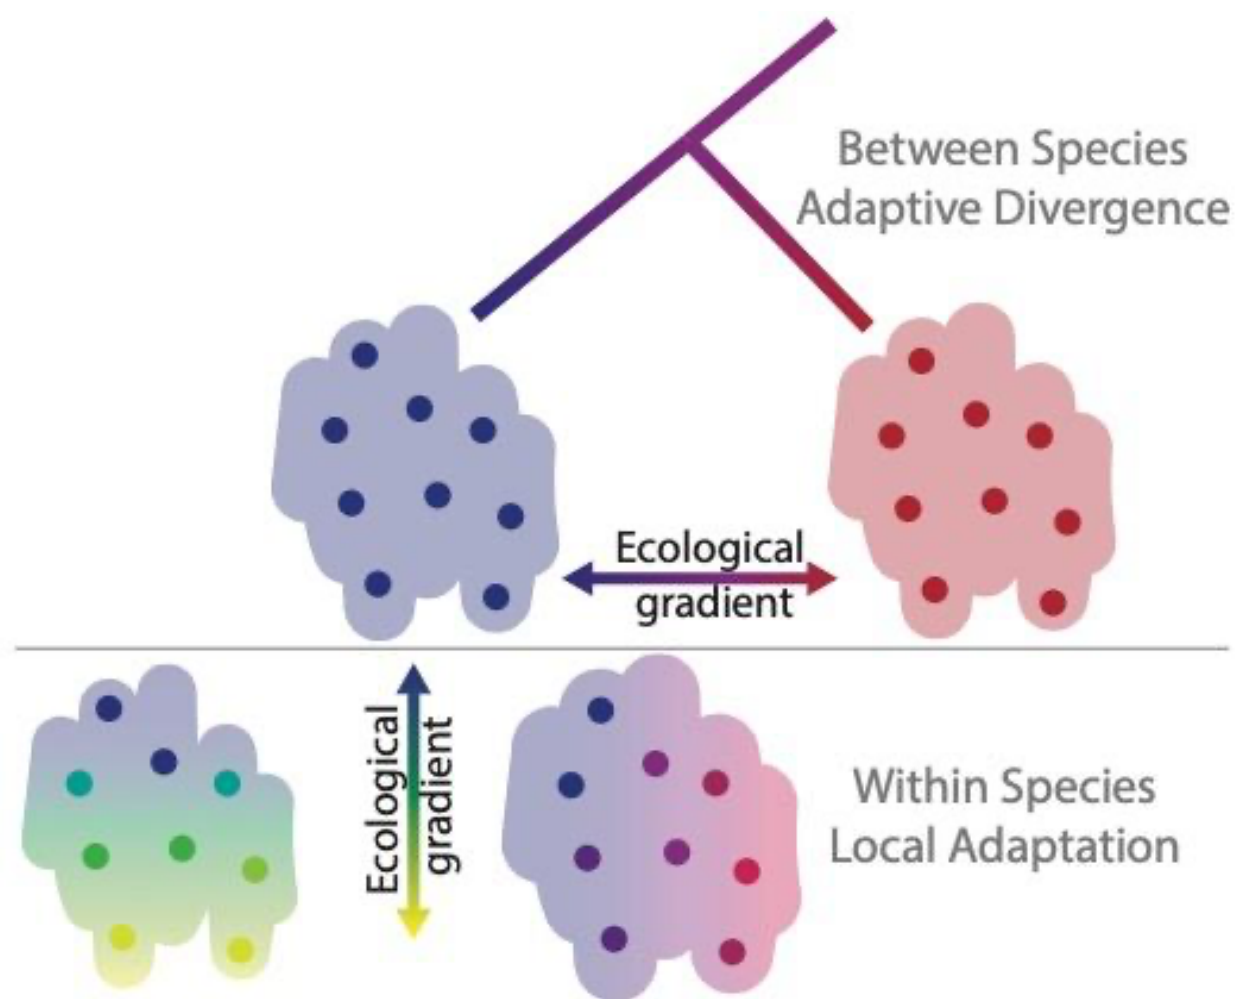

**Figure 1:** Conceptual schematic representing divergence across scales of biological diversity in response to selection along axes of ecological variation. Top panel represents adaptive divergence between populations of two species shown as blue and red dots on different ecological habitats denoted by red and blue backgrounds. Bottom panel represents alternative scenarios of within species local adaptation. Each colored point is a population adapted to the gradient of ecological conditions in the habitat represented by color across the background. In the scenario shown at the right (blue to red), the ecological gradient driving within species local adaptation is parallel to the ecological gradient driving between species adaptive divergence. In the left scenario (blue to yellow) the gradient of within species adaptation is orthogonal to the gradient driving divergence between species (blue to yellow).

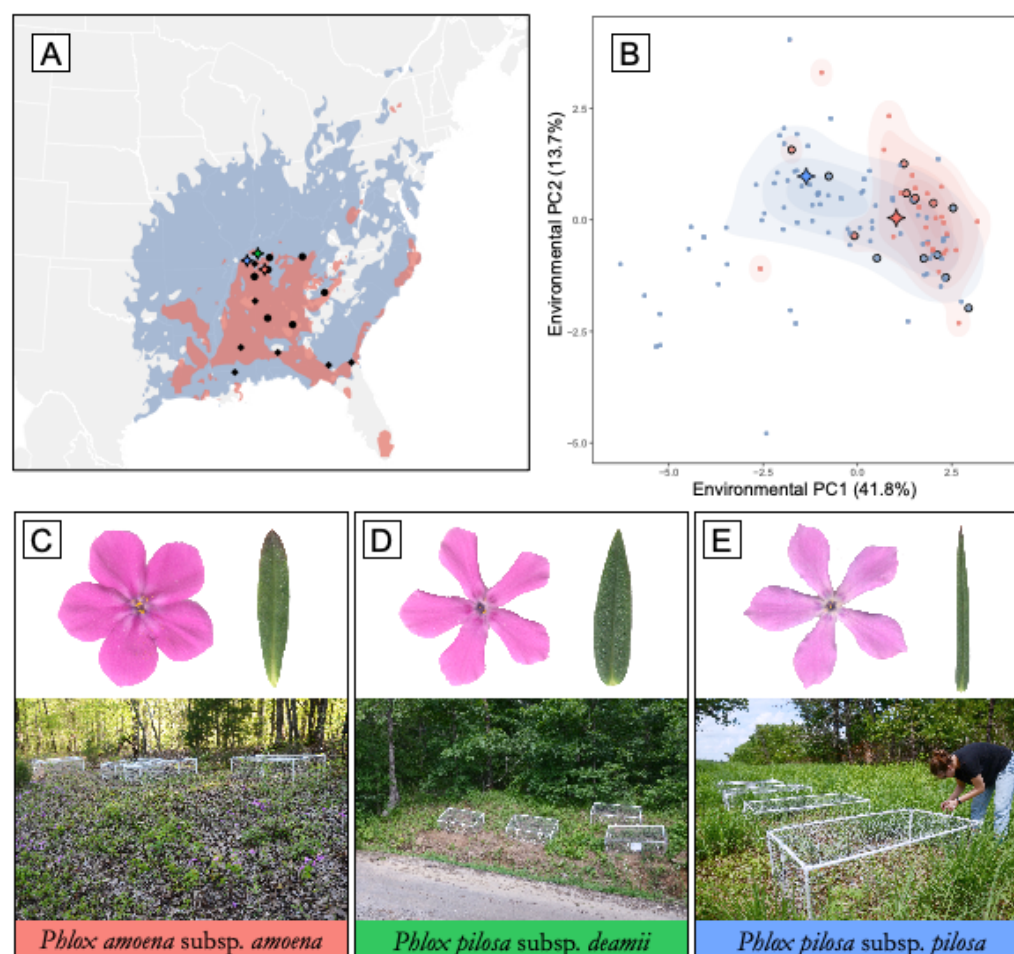

**Figure 2:** Geographic and environmental variation of broadly sympatric *Phlox* species. (A) Ecological niche modeling predicts the geographic distributions of *P. pilosa pilosa* (pilosa; blue) and *P. amoena amoena* (amoena; red) with sampling locations indicated as black diamonds (pilosa) and black circles (amoena). Locations of the common gardens are indicated by colored diamonds. (B) Environmental variation of pilosa and amoena summarized with a principal component analysis. Blue and red points indicate conditions of known populations of pilosa and amoena respectively. Black outlined points are populations sampled for transplant experiment and diamonds are the common garden sites. Representative flowers and leaves (not to scale) and pictures of local common garden site, of amoena (C), *P. pilosa deamii* (deamii) (D), and pilosa (E).

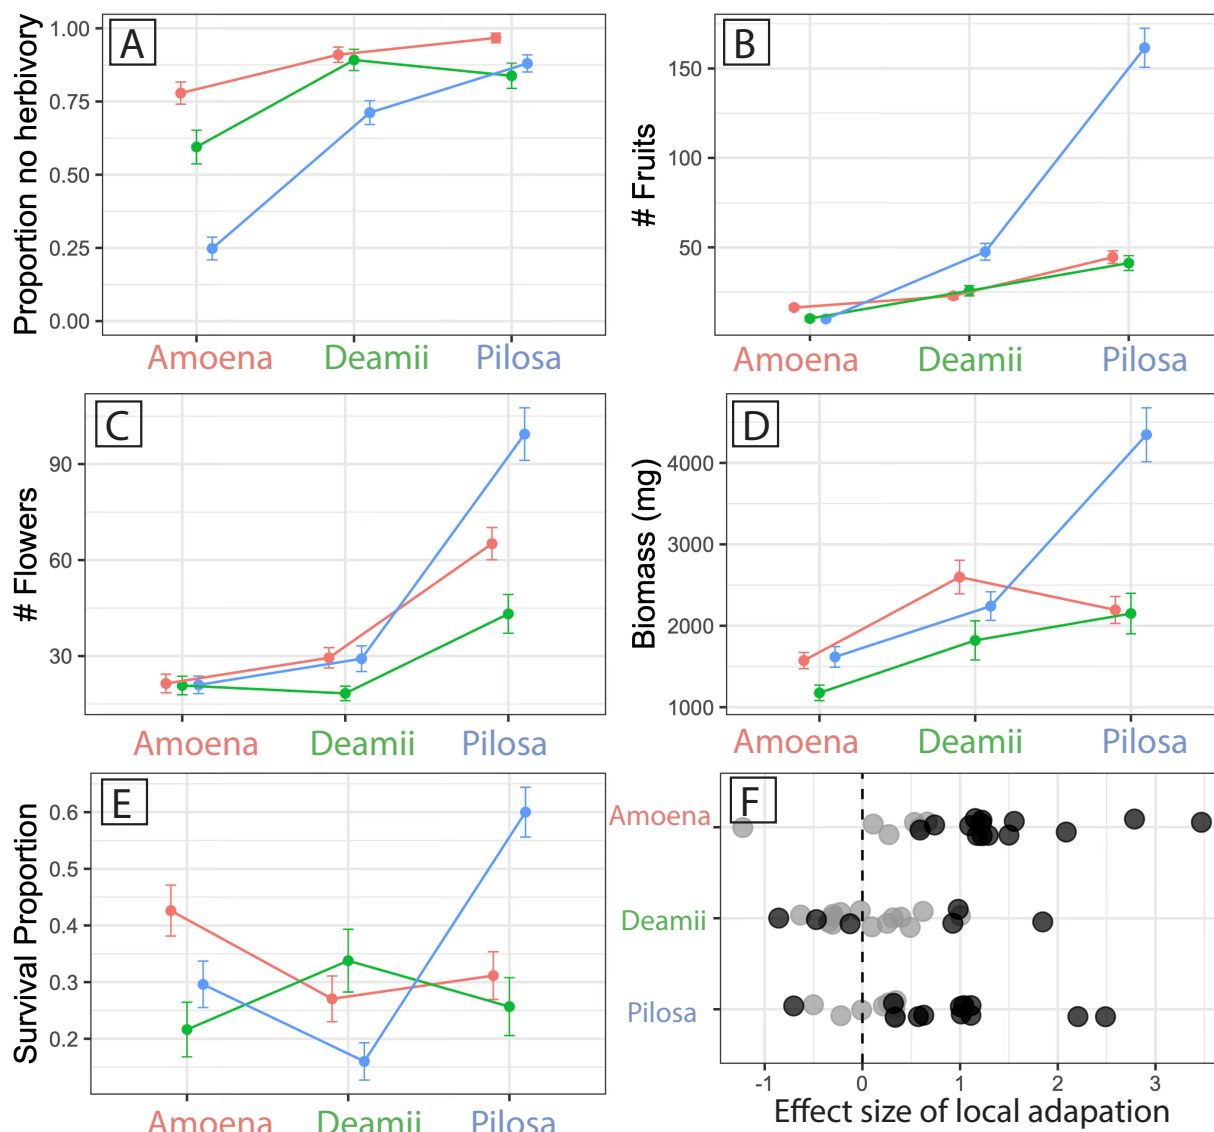

**Figure 3:** Performance of each taxon across three garden environments in A) proportion of plants without herbivore damage, B) total number of flowers, C) total number of fruits, D) aboveground biomass, and E) proportion survived to the end of the experiment. Values plotted are taxon means  $\pm$  standard error in each garden. The ANOVA evaluation of a mixed model analysis for each trait revealed a significant taxon on by garden interaction for all traits. F) Summary of effect size of post-hoc contrasts evaluating local adaptation and home-garden advantage for each species. Positive values indicate local species performed superior while negative values indicate local species performs worse. Black points indicate effect sizes significant at  $p > 0.05$ . See Table 1 for full model results.

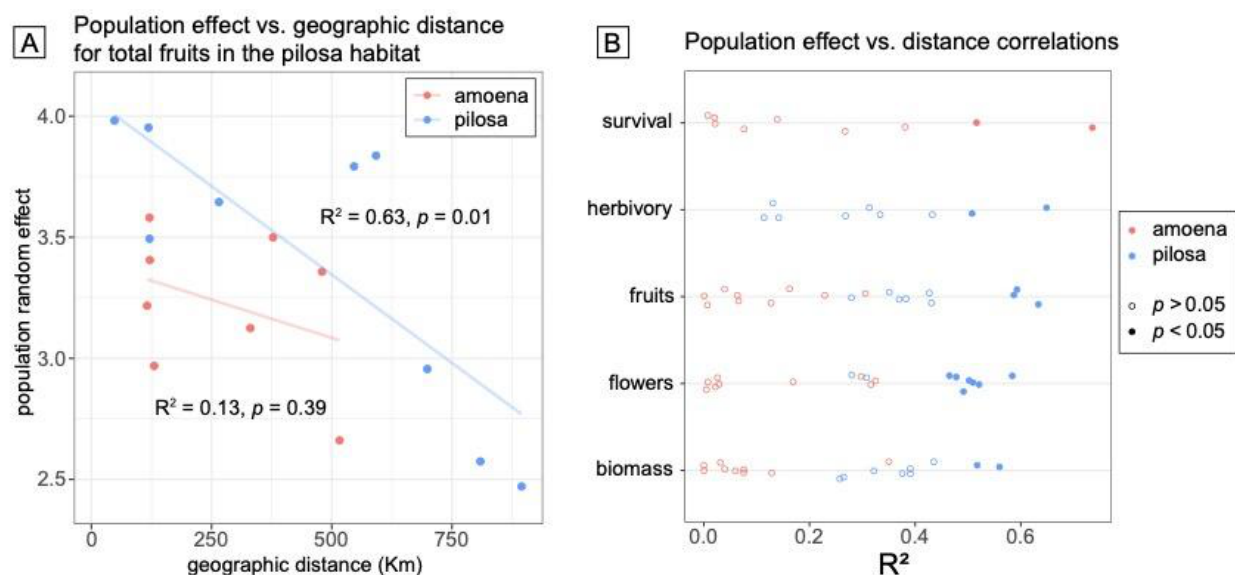

**Figure 4:** Distance from common garden predicts *P. pilosa pilosa* (pilosa) success indicating local adaptation. As an example, (A) the relationship between population effect on total fruit set success and geographic distance for *P. amoena amoena* (amoena; red) and pilosa (blue; populations with  $R^2$  values indicated). (B) Distribution of  $R^2$  values for population effect vs. distance measures among populations of amoena (red) and pilosa (blue) grown in all three experimental gardens. Solid points indicate significant evidence of local adaptation with full model details in Table 2.

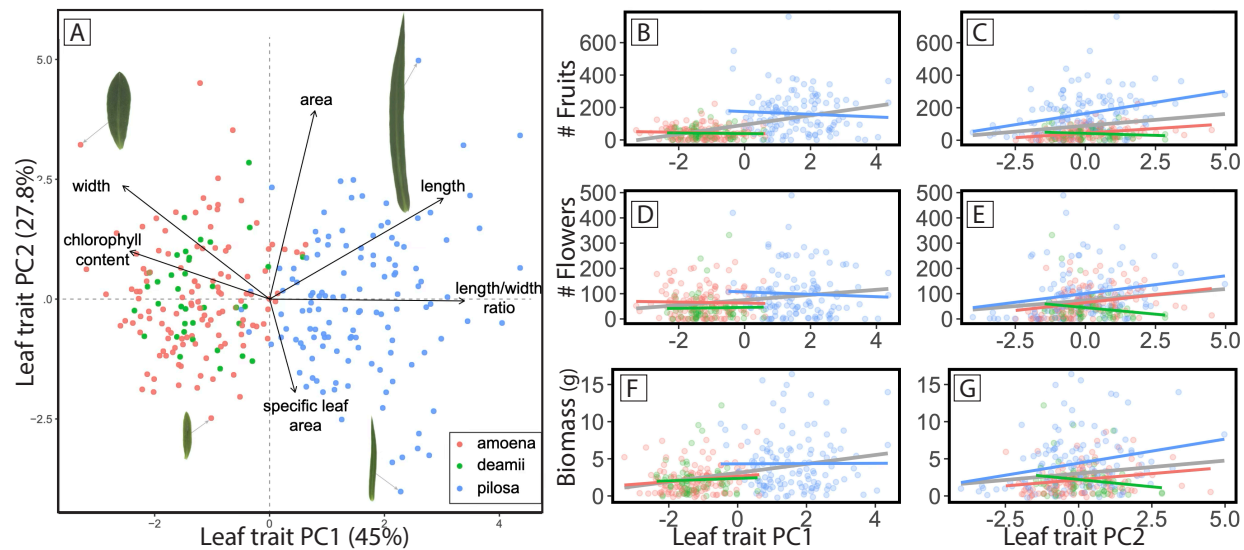

**Figure 5:** Principal components analysis describing phenotypic variation across three *Phlox* species (A). Points indicate values from individuals grown in the common garden experiment and black arrows indicate loadings of specific traits on the axes of variation. Images of four leaves (to scale) are connected to their points with gray arrows to demonstrate variation in shape along PC1 and area along PC2. (B-G) Relationship between fitness traits and leaf trait variation along PC1 and PC2. Colored points indicate fitness values of individuals grown in the *pilosa* habitat garden. Gray lines show significant relationship across all species and colored lines show relationship within each species (*pilosa* in blue, *amoena* in red and *deamii* in green). For PC1, no relationships within species are significant while all within *pilosa* and *amoena* relationships are significant between PC2 and fitness traits. Full results in Table S8.

**Table 1.** Model details for five fitness-related traits measured in a three-garden reciprocal transplant experiment. The  $X^2$  and  $p$ -values reported for taxon\*garden interactions were determined by ANOVA on generalized linear mixed models as described in the methods. The contrasts reported for local vs. foreign and home vs. away comparisons were determined using Tukey's Test. Gray shading indicates a contrast showing evidence of adaptive divergence with local species doing better than foreign or a species doing better in the home versus away garden. Dea indicates the deamii home garden site, Pil indicates the pilosa home garden site, and Amo indicates the amoena home garden site.

|                  | taxon*garden   | amoena                  |                      | deamii                   |                      | pilosa                  |                      |
|------------------|----------------|-------------------------|----------------------|--------------------------|----------------------|-------------------------|----------------------|
|                  |                | local vs. foreign       | home vs. away        | local vs. foreign        | home vs. away        | local vs. foreign       | home vs. away        |
| <b>herbivory</b> | $X^2 = 17.87$  | vs. deamii, $p = 0.037$ | vs. Dea, $p = 0.005$ | vs. amoena, $p = 0.625$  | vs. Amo, $p < 0.001$ | vs. amoena, $p = 0.06$  | vs. Amo, $p < 0.001$ |
|                  | $p = 0.001$    | vs. pilosa, $p < 0.001$ | vs. Pil, $p < 0.001$ | vs. pilosa, $p = 0.082$  | vs. Pil, $p = 0.328$ | vs. deamii, $p = 0.25$  | vs. Dea, $p < 0.001$ |
| <b>flower #</b>  | $X^2 = 685.89$ | vs. deamii, $p = 0.703$ | vs. Dea, $p < 0.001$ | vs. amoena, $p = 0.698$  | vs. Amo, $p < 0.001$ | vs. amoena, $p = 0.789$ | vs. Amo, $p < 0.001$ |
|                  | $p < 0.001$    | vs. pilosa, $p = 0.422$ | vs. Pil, $p < 0.001$ | vs. pilosa, $p = 0.864$  | vs. Pil, $p < 0.001$ | vs. deamii, $p = 0.634$ | vs. Dea, $p < 0.001$ |
| <b>fruit #</b>   | $X^2 = 2583.5$ | vs. deamii, $p = 0.307$ | vs. Dea, $p < 0.001$ | vs. amoena, $p = 0.439$  | vs. Amo, $p < 0.001$ | vs. amoena, $p < 0.001$ | vs. Amo, $p < 0.001$ |
|                  | $p < 0.001$    | vs. pilosa, $p = 0.007$ | vs. Pil, $p < 0.001$ | vs. pilosa, $p = 0.288$  | vs. Pil, $p < 0.001$ | vs. deamii, $p < 0.001$ | vs. Dea, $p < 0.001$ |
| <b>biomass</b>   | $X^2 = 22.03$  | vs. deamii, $p = 0.384$ | vs. Dea, $p = 0.068$ | vs. amoena, $p = 0.110$  | vs. Amo, $p = 0.91$  | vs. amoena, $p = 0.07$  | vs. Amo, $p < 0.001$ |
|                  | $p < 0.001$    | vs. pilosa, $p = 0.466$ | vs. Pil, $p = 0.955$ | vs. pilosa, $p = 0.4425$ | vs. Pil, $p = 0.103$ | vs. deamii, $p = 0.135$ | vs. Dea, $p = 0.001$ |
| <b>survival</b>  | $X^2 = 43.05$  | vs. deamii, $p = 0.004$ | vs. Dea, $p = 0.011$ | vs. amoena, $p = 0.355$  | vs. Amo, $p = 0.099$ | vs. amoena, $p < 0.001$ | vs. Amo, $p < 0.001$ |
|                  | $p < 0.001$    | vs. pilosa, $p = 0.041$ | vs. Pil, $p = 0.063$ | vs. pilosa, $p = 0.007$  | vs. Pil, $p = 0.279$ | vs. deamii, $p < 0.001$ | vs. Dea, $p < 0.001$ |
